# Natural scene movie responses are more precise, reliable & sparse in synchronized than desynchronized cat V1

Martin A. Spacek<sup>1,\*</sup>, Nicholas V. Swindale<sup>1</sup>

<sup>1</sup>Department of Ophthalmology & Visual Sciences  
University of British Columbia, Vancouver, Canada  
\*nn@mspacek.mm.st

November 12, 2015

## Abstract

How does cortical state affect neural responses to naturalistic stimuli, and is it analogous between anesthetized and awake animals? We recorded spikes and local field potential (LFP) in isoflurane-anesthetized cat V1 while repeatedly presenting wide-field natural scene movie clips. Spiking responses were remarkably precise, reliable and sparse. Many units had distinct barcode-like firing patterns, with features as little as 10 ms wide. LFP-derived cortical state switched spontaneously between synchronized (1/f) and desynchronized (broadband). Surprisingly, responses were more precise, reliable and sparse during the synchronized than desynchronized state. However, the desynchronized state under anesthesia is thought to correspond to attending periods in awake animals, during which responses are enhanced. Our results therefore complicate the analogy between cortical states in anesthetized and awake animals. The presence of orientation maps in cat V1 may explain contrary reports in anesthetized rodents, and predicts a similar result in anesthetized ferret and primate V1.

As a complex dynamic system, the brain is never in exactly the same state twice. Spontaneous changes in brain state were noted in even the earliest electroencephalogram (EEG) recordings in humans<sup>1</sup>. However, most experiments that examine sensory neural responses to repeated presentations of identical stimuli implicitly assume that the brain is in the same state at the onset of each trial, and that averaging over trials will provide a reasonable estimate of response variability. There is increasing evidence that this may not always be the case, even under anesthesia<sup>2,3</sup>. Brain state can play a major role in response variability, and taking brain state into account can reduce apparent response variability<sup>4</sup>.

There are two broad categorizations of brain state: synchronized and desynchronized<sup>4,5</sup>. The synchronized state is characterized by large amplitude low frequency fluctuations, and occurs during deep anesthesia, slow-wave sleep, and awake quiescent periods (quiet wakefulness). The synchronized state can be further subdivided into UP and DOWN phases<sup>4,5</sup>, corresponding to periods of higher and lower resting membrane potential. The desynchronized state is characterized by low amplitude high frequency fluctuations, and occurs during light anesthesia, rapid eye movement (REM) sleep, and awake attending behavior.

Visual neuroscience has traditionally relied on reduced stimuli such as drifting bars and gratings to characterize response properties. Naturalistic stimuli can elicit responses that are poorly predicted from responses to reduced stimuli<sup>6</sup>. Although reduced stimuli are easier to characterize and are of much lower dimensionality than naturalistic stimuli, relying too heavily on reduced stimuli

may obscure insights into how the brain processes visual information. To more fully characterize neural populations in visual cortex, it is therefore important to consider responses to naturalistic stimuli in addition to reduced stimuli. Although sequences of natural images are spatially naturalistic, the gold standard is natural scene movies<sup>6,7</sup>, which are both spatially and temporally naturalistic.

How variable are natural scene movie responses in V1, and how does cortical state influence them? We examined response variability in single units across most layers of primary visual cortex (V1) in isoflurane-anesthetized cats using single-shank silicon polytrodes, while stimulating with natural scene movies containing saccade-like camera movements. Cortical state varied spontaneously over time, and was characterized by the frequency content of deep-layer local field potential (LFP). Recordings were divided into synchronized and desynchronized periods. Spiking responses to natural scene movies were at times remarkably precise, reliable and sparse, consisting of barcode-like patterns of response events consistent across trials, some as little as 10 ms wide. Correlations between trial-averaged responses of unit pairs were weak overall ( $\sim 0.1$ ) at the 20 ms time scale, but were stronger in the synchronized than desynchronized state. Contrary to reports in primary sensory cortices of anesthetized rodent<sup>8–12</sup>, natural scene movie responses in anesthetized cat V1 were more precise, reliable and sparse in the synchronized than desynchronized state. In the synchronized state, trial-averaged responses were also better correlated with motion within the movie. These results are surprising, because the synchronized state under anesthesia is thought to correspond to quiescent periods in awake animals and the desynchronized state to alert attending periods<sup>4,5</sup>, and neural responses are known to be enhanced to attended stimuli<sup>13–17</sup>.

Our results therefore complicate the analogy between cortical states in anesthetized and awake animals. One possible reason for this conflicting result may be the presence of orientation maps in cat V1 and their absence in rodent V1. Standing and traveling waves<sup>18–20</sup> of activation (UP phases) in the synchronized state may interact differently with incoming stimuli in V1 of higher mammals. This explanation predicts a similar result in anesthetized V1 of other species with orientation maps, such as ferrets and primates, but fails to explain the opposite result in awake animals<sup>21,22</sup>.

## Results

### Cortical state

Cortical state was characterized by the frequency content of the deep-layer LFP (**Fig. 1**). The synchronized state was defined by large amplitude low frequency fluctuations with an approximately  $1/f$  distribution, while the desynchronized state consisted of lower amplitude fluctuations spanning a wider range of frequencies (**Fig. 1a,b**). Spontaneous transitions between the two states were visible in the LFP spectrogram (**Fig. 1c**). A synchrony index (SI) (**Fig. 1d**) was used to quantify the degree of synchronization over time. SI was defined as the  $L/(L+H)$  ratio, where  $L$  and  $H$  are the power in low (0.5–7 Hz) and high (15–100 Hz) LFP frequency bands, respectively (**Fig. 2f, Methods**). SI ranged from 0 to 1, where 1 represents maximum synchronization. The distribution of SI from all recordings is shown in **Fig. 1d** (inset). Based on both visual inspection of the LFP spectrogram and application of thresholds to the corresponding SI (synchronized:  $SI > 0.85$ ; desynchronized:  $SI < 0.8$ ; exact thresholds varied slightly between recordings), recordings were divided into periods of synchronized, desynchronized and undefined states. Six natural scene movie recordings (3.5 h total duration, 5 penetrations in 3 cats) exhibited an obvious spontaneous change in cortical state (5 from desynchronized to synchronized, 1 from synchronized to desynchronized, **Fig. 1c & Fig. 2a–e**). A similar amount of time was spent in both states (104 min synchronized, 93 min desynchronized, 10 min undefined). A total of 219 single units were isolated in these 6

82 recordings.

## 83 Natural scene movie responses

84 Spike raster plots of 3 example single units are shown in **Fig. 3**, in response to 400 presentations of  
85 two different wide-field natural scene movie clips, each 4.5 s in duration. One spontaneous cortical  
86 state transition occurred during each movie. Spike raster plots across trials exhibited a pattern  
87 reminiscent of UPC barcodes, consisting of remarkably precise, reliable and sparse response events.  
88 For both natural scene movies, this pattern was visibly more pronounced during the synchronized  
89 than desynchronized state. Each unit's peristimulus time histogram (PSTH, i.e., the response  
90 averaged over trials) was classified as responsive during a given cortical state if it contained at  
91 least one response event. Response events were detected using an automated method to cluster  
92 spike times (**Methods**). Example PSTHs are shown underneath the raster plots in **Fig. 3** &  
93 **Fig. 5**, with colored dots marking detected response events. A total of 267 out of a possible 563  
94 PSTHs were classified as responsive. There were more responsive PSTHs in the synchronized than  
95 desynchronized state (153 vs. 114,  $\chi^2$  test,  $p < 0.02$ ), and significantly more response events in the  
96 synchronized than desynchronized state (1167 vs. 703,  $\chi^2$  test,  $p < 7.4 \times 10^{-27}$ ).

97 The 3 example units in **Fig. 3** were responsive to both natural scene movie clips, but some  
98 units in that pair of recordings were responsive to only one movie and not the other. **Fig. 4** shows  
99 3 such example units. For the two natural scene movie recordings shown in **Fig. 3** & **Fig. 4**,  
100 51% (20/39) of responsive units were responsive during only one movie: 8 responded only to the  
101 first movie, and 12 responded only to the second. However, 50% (39/78) of units isolated in that  
102 penetration did not respond to either movie. Some units were responsive in one cortical state but  
103 nonresponsive in the other (**Fig. 4b**, **Fig. 5c**). Across all 6 recordings, 30% (49/163) of responsive  
104 units were responsive only during the synchronized state, 6% (10/163) were responsive only during  
105 the desynchronized state, and 64% (104/163) were responsive during both states.

106 The responses of another 3 example units to a different movie in a different cat are shown in  
107 **Fig. 5**. Even though the spectrogram and the SI of the desynchronized state was more consistent  
108 in this recording (**Fig. 2b**; **Fig. 5a**) than in the other two example recordings (**Fig. 1c** & **Fig. 2d**;  
109 **Fig. 3a** & **e**), responses for these example units were again visibly more precise, reliable and sparse  
110 in the synchronized than desynchronized state.

111 Response amplitude, precision, reliability and sparseness are summarized in **Fig. 6** for all 267  
112 units with at least one response event, across all 6 recordings during which a spontaneous change  
113 in cortical state occurred. All four measures were significantly greater in the synchronized than  
114 desynchronized state (means,  $p$  values, and statistical tests reported in **Fig. 6**). Five unique movie  
115 clips were presented in these 6 recordings. Response event amplitude was quantified as the height  
116 (in Hz) above baseline of each peak in the PSTH (**Methods**). Response event width (in ms) was  
117 quantified as twice the standard deviation of the spike times belonging to the event. Response  
118 reliability was quantified as the mean pairwise correlation of all trial pairs of a unit's responses.  
119 The sparseness (**Eq. 1**) of each PSTH ranged from 0 to 1, with 0 corresponding to a uniform signal,  
120 and 1 corresponding to a signal with all of its energy in a single time bin.

121 There was no strong dependence of response precision, reliability and sparseness on unit position  
122 along the length of the polytrode (**Fig. 7**). Because polytrode insertions were generally vertical,  
123 and were inserted to a depth relative to the surface of the cortex (**Methods**), position along the  
124 polytrode roughly corresponded to cortical depth. In both cortical states, response precision and  
125 sparseness (**Fig. 7a,c**), but not reliability (**Fig. 7b**), were higher in superficial layers.

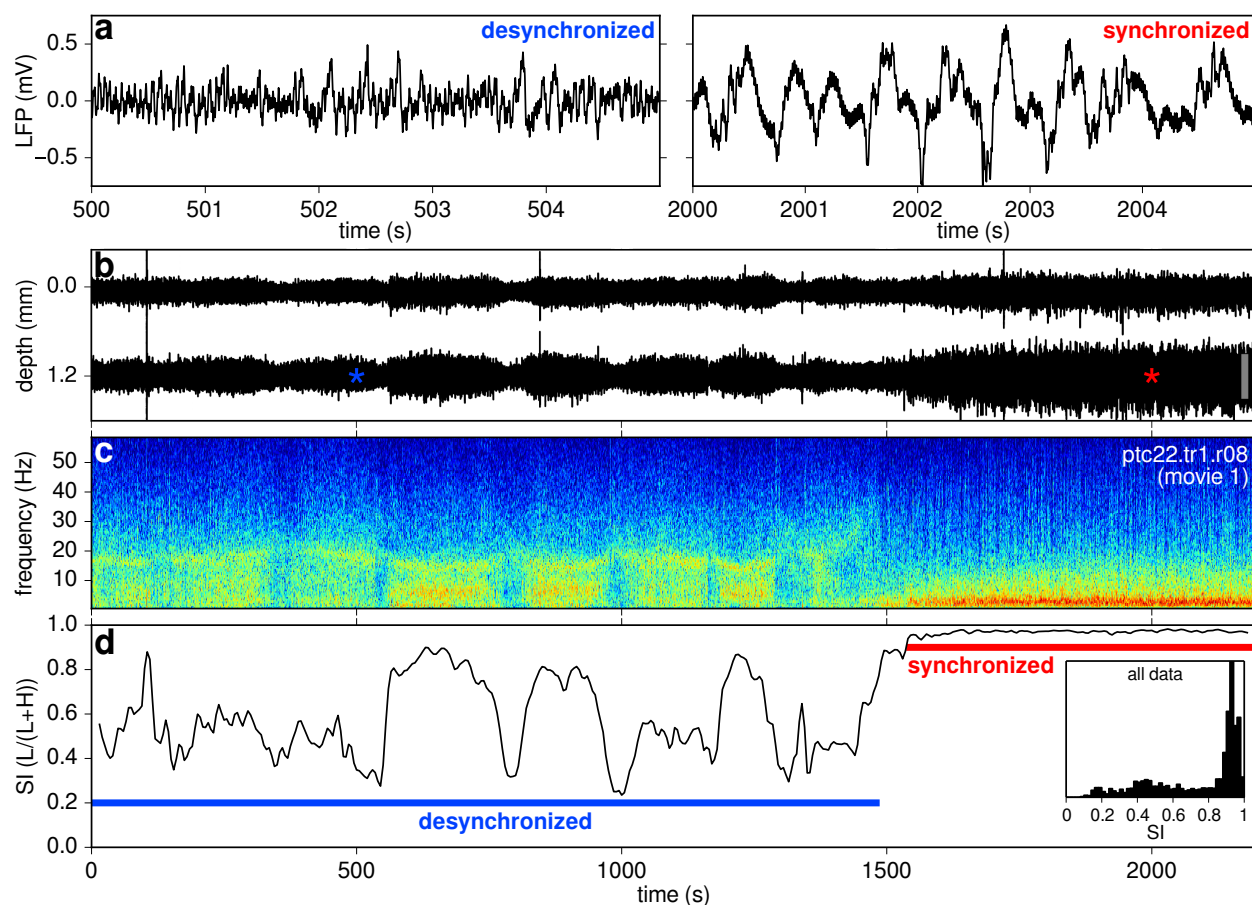

**Figure 1** A spontaneous change in cortical state during 37 min of repeated presentation of a 4.5 s natural scene movie clip. (a) Short representative deep-layer LFP voltage traces during the desynchronized and synchronized state. (b) Full duration superficial and deep-layer LFP, with depth measured from the top of the polytrode. Colored asterisks indicate time periods of the panels in (a). Scale bar: 1 mV. (c) Deep-layer LFP spectrogram. Red represents high power, blue low power (arbitrary units). The synchronized state had a  $\sim 1/f$  frequency distribution, while the frequency distribution of the desynchronized state was more broadband and variable. (d) Synchrony index (SI) calculated from the  $L/(L+H)$  frequency band ratio of the spectrogram. Cortical state switched spontaneously from desynchronized to synchronized about 2/3 of the way through the recording. Blue and red horizontal lines indicate the duration of the desynchronized and synchronized periods, respectively. Inset, SI histogram for all 3.5 h of natural scene movie recordings.



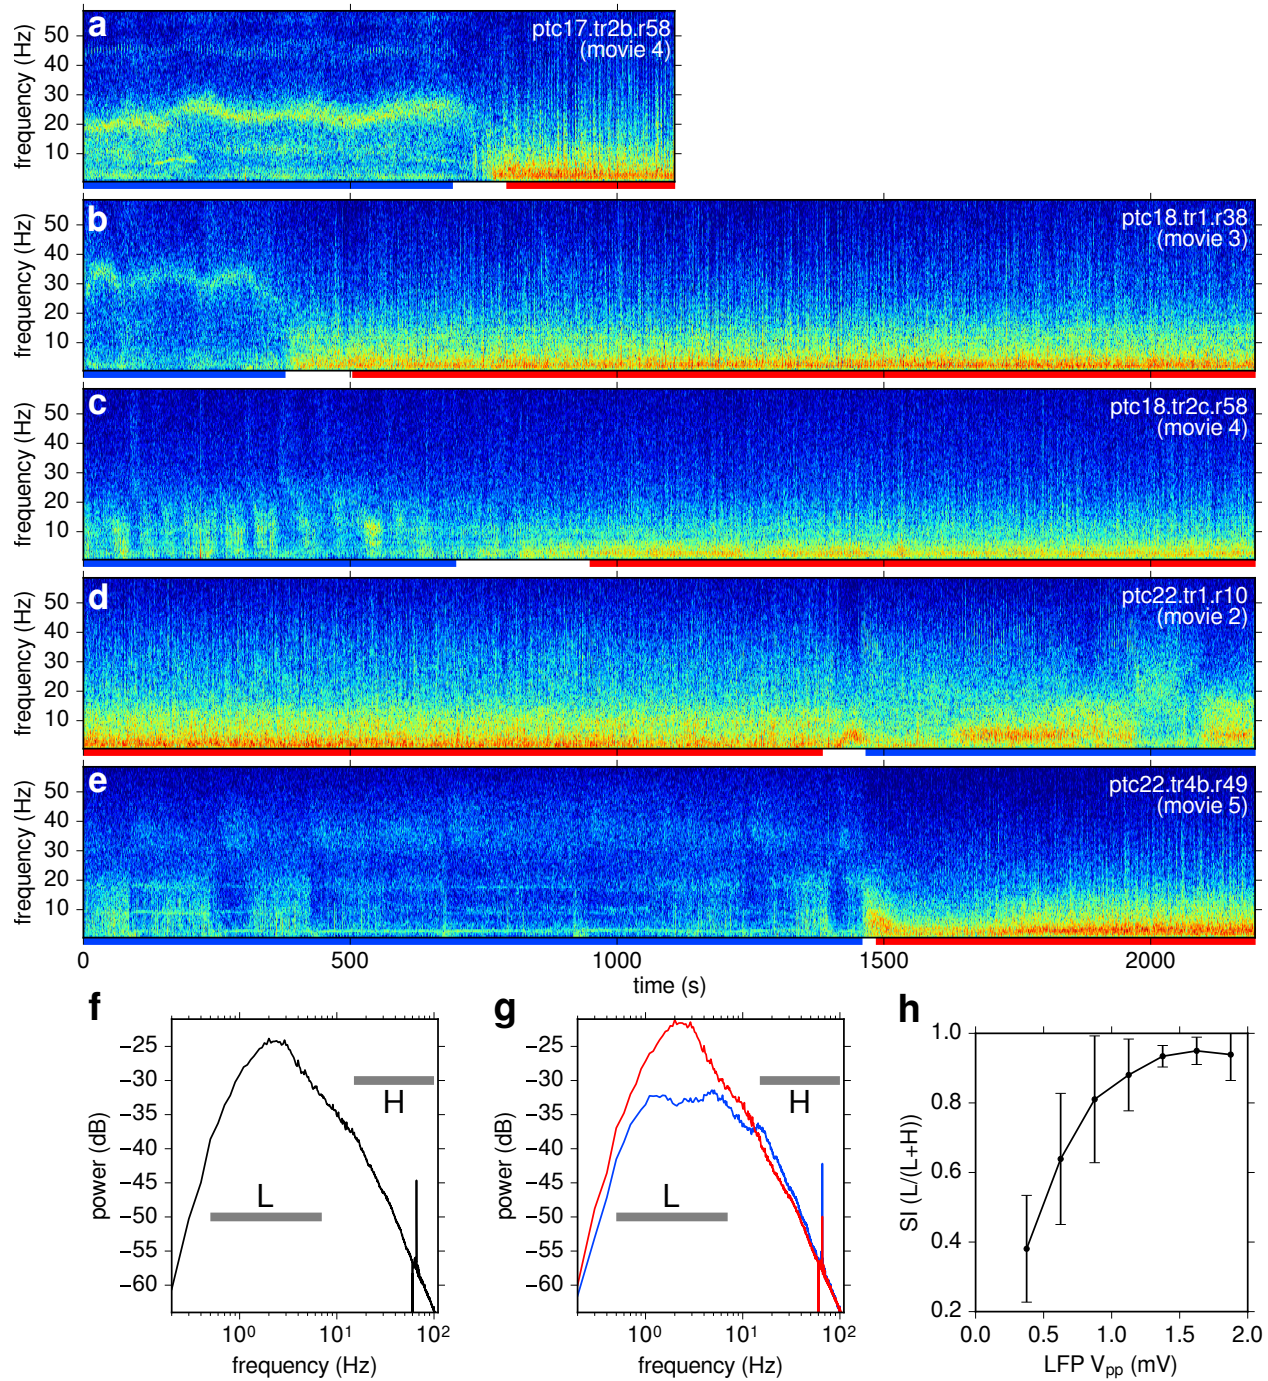

**Figure 2 (Previous page, Supplementary)** LFP spectrograms and power spectral density (PSD). (a–e) Spectrograms from 5 of the 6 recordings (in addition to that shown in **Fig. 1c**) during 200 (a) or 400 (b–e) presentations of a 4.5 s natural scene movie clip. Blue and red horizontal lines underneath each spectrogram indicate the duration of the desynchronized and synchronized periods, respectively, in each of the recordings, as determined from the SI (not shown). (f) PSD of all 6 recordings. Power is in decibels relative to  $1 \text{ mV}^2$ . Horizontal lines mark the limits of the low (L) and high (H) bands used to calculate SI. On this log-log scale, the low band is roughly centered on the broad peak at  $\sim 2 \text{ Hz}$ . Some of the attenuation below  $1 \text{ Hz}$  is due to analog filtering during acquisition. The narrow positive peak at  $66 \text{ Hz}$  corresponds to the movie frame rate, and the narrow negative peak at  $60 \text{ Hz}$  is from filtering out mains interference (**Methods**). (g) Same as (f) but split into synchronized (red) and desynchronized (blue) periods, showing greater low frequency power in the synchronized state. (h) SI (mean  $\pm 1$  standard deviation) covaried positively with LFP peak-to-peak amplitude ( $V_{pp}$ ,  $0.25 \text{ mV}$  wide bins).

## Bursting and mean rates

Are the response events described above due to bursting, in which a single unit fires multiple spikes in close succession, or are they usually composed of no more than a single spike on any given trial? The distributions of spike counts per response event per trial are shown in **Fig. 8a**, separately for each state. In both states, the distribution was very close to lognormal (dashed curves), with geometric means of  $0.5 \text{ spikes/event/trial}$ , well below  $1 \text{ spike/event/trial}$ . In the synchronized and desynchronized states,  $78\%$  and  $76\%$ , respectively, of response events had  $\leq 1 \text{ spike/trial}$ . Therefore,  $> 75\%$  of response events in either state were unlikely to be the result of bursting.

How might mean firing rates vary as a function of cortical state? Although intuition suggests that rates should be higher in the desynchronized state, previous reports show no clear relationship between mean firing rates and cortical state<sup>4,8</sup>. The mean firing rate of each unit during a cortical state was calculated by taking its spike count during that state and dividing by the duration of the state. The distributions of mean firing rates across the population are shown separately for both states in **Fig. 8b**. Mean firing rates spanned a wide range ( $0.0005\text{--}50 \text{ Hz}$ ), with a distribution that was approximately lognormal (dashed curves). This was the case in both states. Surprisingly, mean rates in the synchronized and desynchronized state were not significantly different (Mann-Whitney U test, ensemble geometric means of  $0.18$  and  $0.14 \text{ Hz}$  and standard deviations of  $1.0$  and  $1.1$  orders of magnitude, respectively).

## Response correlations and MUA coupling

By definition, pairwise correlations of single unit responses should be greater in the synchronized than desynchronized state. Pearson's correlation between PSTHs was calculated for all simultaneously recorded pairs of responsive single units. This was done separately for both cortical states. Response correlations were weakly positive on average, and were indeed significantly greater in the synchronized than desynchronized state ( $0.18$  and  $0.11$ , respectively, Mann-Whitney U test, **Fig. 8c**). Response correlations in both states had a weak but significantly negative dependence on unit pair separation (**Fig. 8d**).

A recent report has shown that the degree of coupling between single unit and multi-unit activity (MUA) is a simple but consistent metric for characterizing single units, and that it can be used to predict single unit pairwise response correlations and the probability of synaptic connectivity with other neighboring neurons<sup>23</sup>. How might MUA coupling relate to cortical states and natural scene

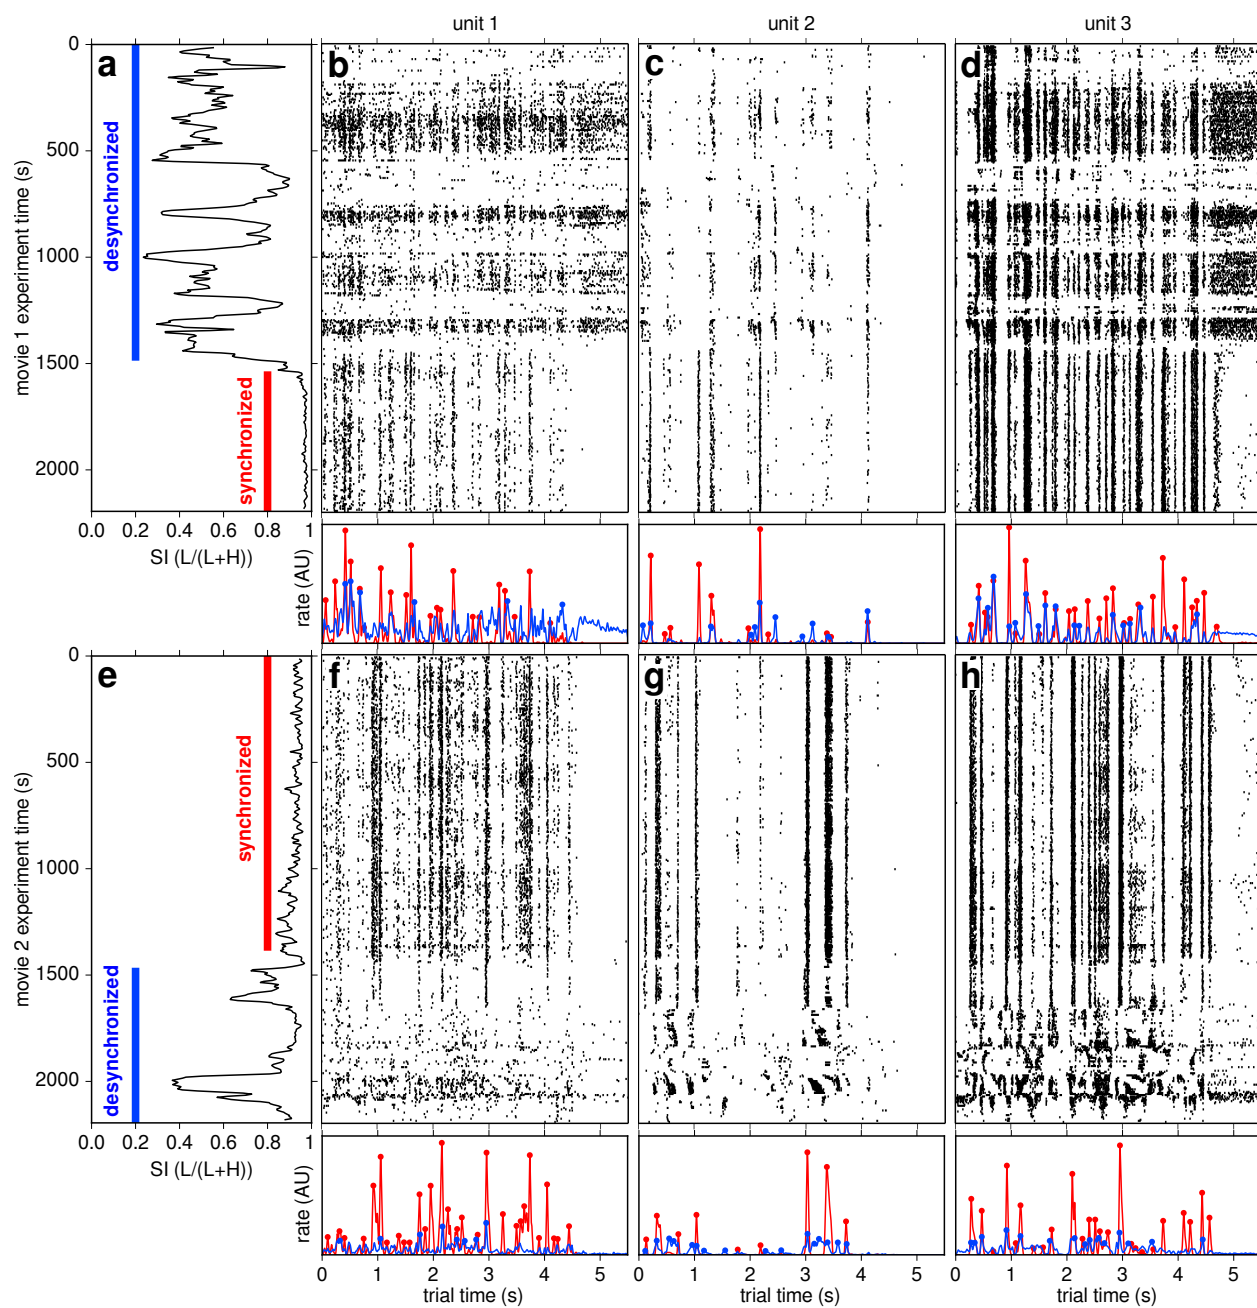



**Figure 3 (Previous page)** Cortical state affects precision, reliability and sparseness of natural scene movie responses. During 400 presentations (vertical axis) of two different 4.5 s (horizontal axis) natural scene movie clips (upper and lower panels) in the same penetration, two spontaneous cortical state transitions occurred: from desynchronized to synchronized (**a**, same recording as in **Fig. 1**), and from synchronized back to desynchronized (**e**, same recording as in **Fig. 2d**). SI is shown in the leftmost column. Vertical colored lines indicate the duration of each cortical state (**red**: synchronized; **blue**: desynchronized). (**b–d, f–h**) Trial raster plots of natural scene movie responses of 3 example units (one per column), left to right in order of increasing depth from the top of the polytrode (161, 186 and 820  $\mu\text{m}$ , respectively). Each black tick represents one spike. Each presentation was separated by 1 s of blank gray screen (from 4.5 to 5.5 s of trial time). PSTHs are shown underneath each raster plot, color-coded by state, with dots marking detected response events. For display purposes, each PSTH panel uses a different vertical scale. For all 3 example units during both movies, responses were visibly more precise, reliable and sparse during the synchronized state than the desynchronized state. A 20 minute gap of blank gray screen stimulation separated the end of the first recording (**a**) from the start of the second (**e**). Patterns of response events were distinct for all 3 example units, even for the first two whose physical separation was only  $\sim 25 \mu\text{m}$ . AU: arbitrary units.

movie responses in cat V1? MUA coupling was calculated for each single unit by calculating the trial-averaged MUA (e.g., **Fig. 10d**) from all single units, excluding the single unit of interest, and correlating that with the unit's PSTH (**Methods**). This was done for all single units during both cortical states. **Fig. 9a** shows the distributions of MUA coupling across the population. MUA coupling was significantly greater in the synchronized than desynchronized state (Mann-Whitney U test,  $p < 6 \times 10^{-5}$ ). Single unit response reliability was significantly and positively correlated with MUA coupling, in both cortical states (**Fig. 9b**). However, response sparseness was not significantly correlated with MUA coupling in either state (**Fig. 9c**).

## LFP and MUA reliability and sparseness

Given that single unit responses during natural scene movie stimulation were more reliable and sparse in the synchronized state (**Fig. 6**), does the same hold for the LFP and MUA? Trial-aligned LFP and MUA are shown in **Fig. 10a,d** in both cortical states for one example recording. As expected, the amplitudes of the LFP and MUA were greater in the synchronized state (shown more explicitly for LFP in **Fig. 2h**). LFP and MUA reliability were measured in a similar way as for single unit responses, using Pearson's correlation between the signal on each trial and the mean of the signal on all other trials. This was done for all trials in both states in all 6 recordings (988 desynchronized trials, 1093 synchronized trials). LFP and MUA reliability were both significantly greater in the synchronized than desynchronized state (**Fig. 10b,e**). The sparseness of each of these LFP and MUA traces were also measured (for LFP, sparseness of the absolute value of the signal was used). Response sparseness was also significantly greater in the synchronized state (**Fig. 10c,f**).

## Stimulus representation

How do precise and reliable single unit responses, such as those shown in **Fig. 3–Fig. 5**, relate to the visual stimulus, and how does stimulus representation vary with cortical state? Calculating receptive fields from short repetitive natural scene movie clips is a difficult and perhaps intractable



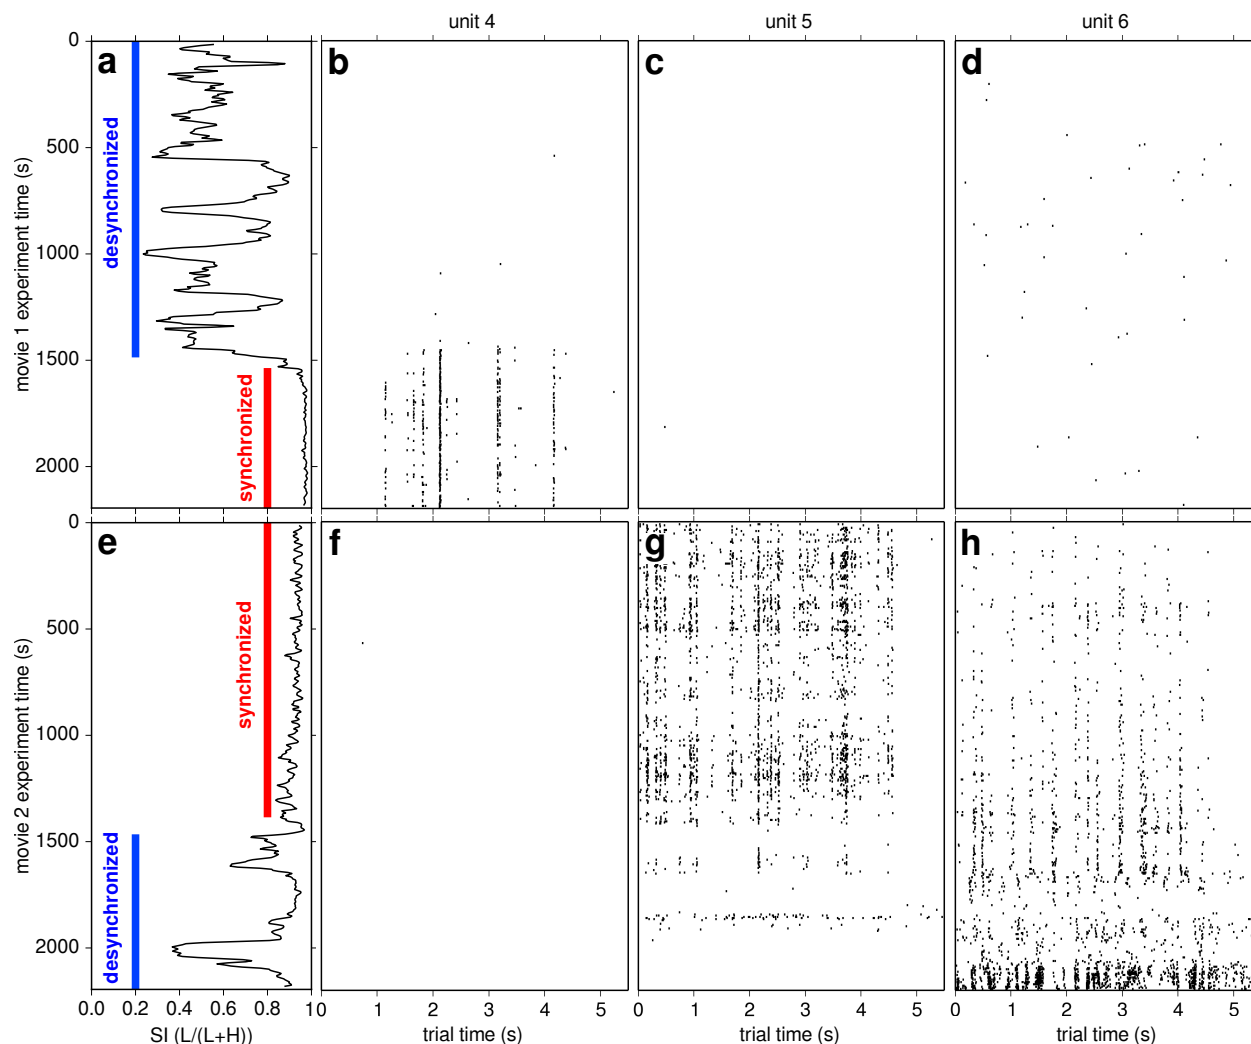

**Figure 4** Same as **Fig. 3** (excluding PSTHs) but with 3 more example units, each of which had response events during one movie but not the other. Panels (c) & (f) had only one spike each. Two of the example units (b,g) had response events only during the synchronized state. Left to right, units are in order of increasing depth from the top of the polytrode (77, 974 and 1197  $\mu\text{m}$ , respectively). Although difficult to see in this layout, visual inspection revealed that the last two units in the second recording (g,h) shared several response events that fell within a few ms of each other.

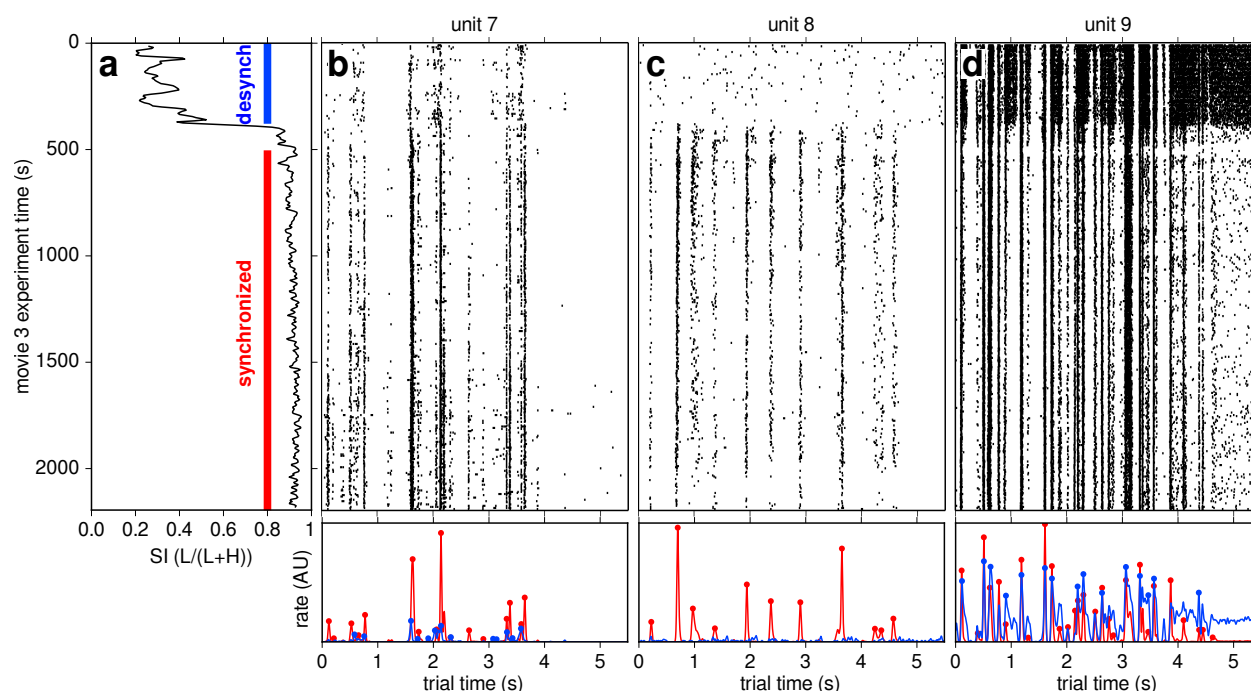

**Figure 5** Responses of 3 more example units in a different recording in a different cat, to 400 presentations of a different movie clip (same layout as upper panels in **Fig. 3**). **(a)** SI over the course of 37 min of repeated presentation of a 4.5 s natural scene movie clip (same recording as in **Fig. 2b**). SI in the desynchronized state was more consistently low in this recording than in **Fig. 3** & **Fig. 4**, yet the results were similar: responses were again visibly more precise, reliable, and sparse in the synchronized than desynchronized state. Left to right, units are in order of increasing depth from the top of the polytrode (367, 847 and 974  $\mu\text{m}$ , respectively). Again, although difficult to see in this layout, visual inspection revealed that the first and last units (**b,d**) shared several response events that fell within a few ms of each other, despite high physical separation ( $\sim 610 \mu\text{m}$ ). Neither unit shared any response events with the middle unit (**c**).

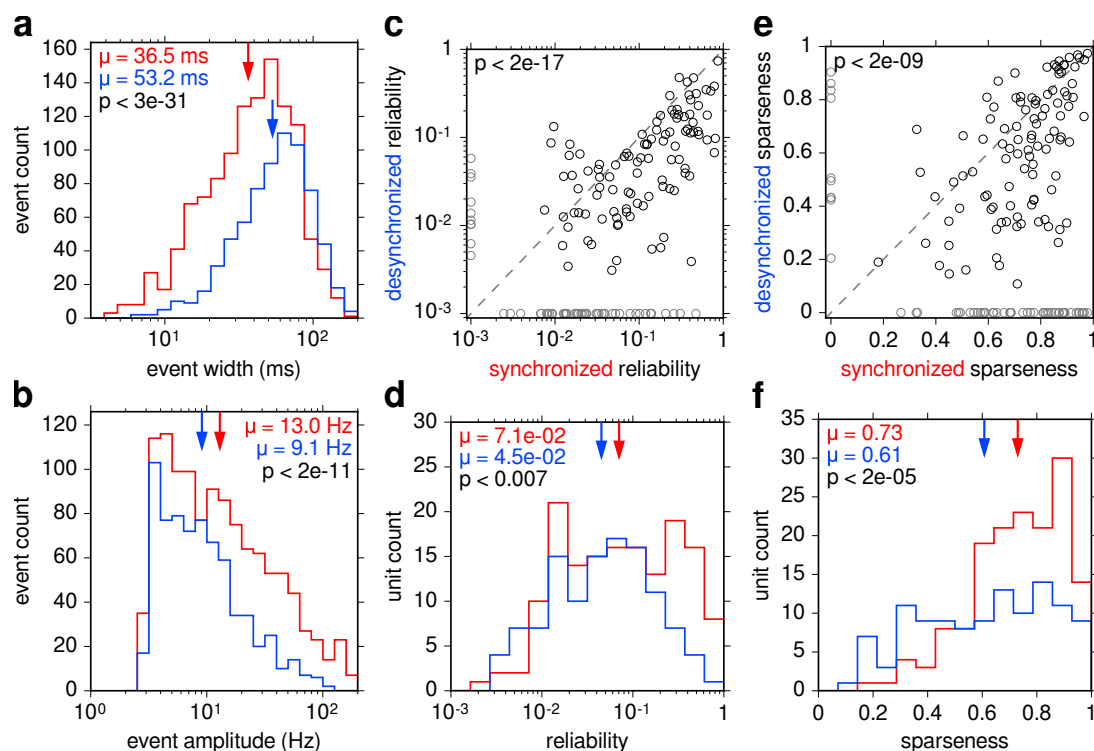

**Figure 6** Response precision, reliability and sparseness vs. cortical state for all 6 recordings. (a) Distributions of response event widths during the synchronized (red) and desynchronized (blue) state. (b) Distributions of event amplitudes relative to baseline firing (Methods). (c) Scatter plot of response reliability in the two cortical states for all units that were responsive in at least one state. For display purposes, units with no response events during a cortical state were assigned a reliability of  $10^{-3}$  in that state (gray). Significantly more units fell below the dashed  $y = x$  line than above it (83%, 136/163,  $p < 2 \times 10^{-17}$ ,  $\chi^2$  test). (d) Response reliability distributions for the points in (c), excluding those set to  $10^{-3}$ . (e) Scatter plot of response sparseness in the two cortical states for all units that were responsive in at least one state. For display purposes, units with no response events during a cortical state were assigned a sparseness of 0 in that state. Significantly more units fell below the dashed  $y = x$  line than above it (74%, 120/163,  $p < 2 \times 10^{-9}$ ,  $\chi^2$  test). (f) Response sparseness distributions for the points in (e), excluding those set to 0. Arrows denote geometric means in (a), (b) & (d), and arithmetic means in (f). Response events were significantly narrower and higher, and responses were significantly more reliable and sparse in the synchronized than desynchronized state ( $p$  values in (a), (b), (d) & (f), Mann-Whitney U test).

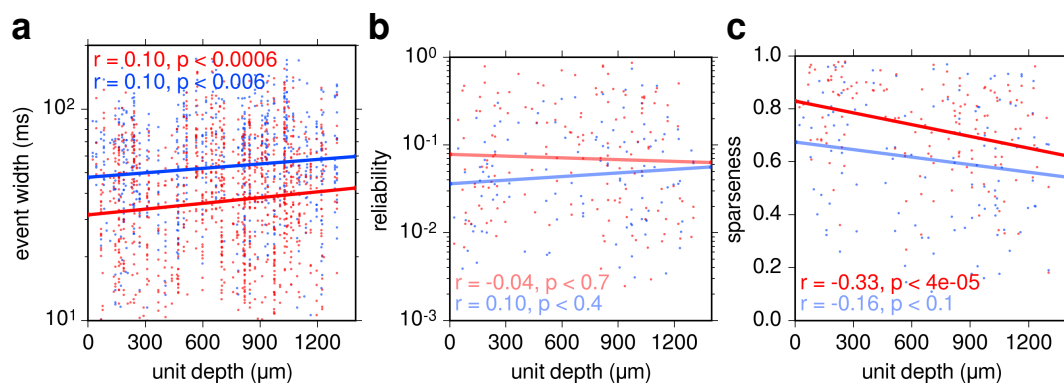

**Figure 7 (Supplementary)** Single unit response precision, reliability and sparseness vs. unit depth from the top of the polytrode, for all 267 responsive units in all 6 recordings. **(a)** Each point represents a response event. Response event width was weakly but significantly positively correlated with unit depth in both the synchronized (**red**) and desynchronized (**blue**) state. Response precision was therefore weakly but negatively correlated with unit depth in both states. The difference in mean event width between the two states was consistent ( $\sim 16$  ms) as a function of unit depth. **(b)** Each point represents a responsive PSTH. Response reliability was not significantly correlated with unit depth in either state. **(c)** Response sparseness was significantly negatively correlated with unit depth in only the synchronized state. Lines show least squares linear regression (two-sided Student's T-test,  $r$ - and  $p$ -values shown in each panel). Desaturated lines and statistics denote insignificant correlations.

problem, given the spatial and temporal correlations inherent to movies<sup>7</sup>, and the low number of movie frames per clip (300 for each of the 5 unique clips used here). Instead, responses were compared to the global motion, contrast and luminance calculated as a function of time from all of the on-screen pixels of each movie clip (**Methods**). The correlation between each responsive unit's PSTH and movie global motion, contrast and luminance signals was calculated separately in each cortical state. **Fig. 11a** shows movie frames and the global motion signal of an example movie clip (same as **Supplemental Movie** and **Fig. 2a,c**), as well as the PSTH of an example single unit in both cortical states. Movie clips consisted of simulated saccades generated by manually rotating the camera with short, quick motions. This resulted in a highly kurtotic distribution of global motion within the movies (**Fig. 11b**). The correlation between responsive PSTHs and global motion was weak, but was significantly greater in the synchronized than desynchronized state (**Fig. 11c,d**, mean values of 0.091 and 0.041 respectively). This was when calculated at a delay of 30 ms (2 movie frames) between stimulus and response. The mean PSTH-motion correlation as a function of stimulus-response delay is shown in **Fig. 11e**. Not only was it greatest in the synchronized state at a delay of 30 ms, but stimulus-response delay modulated PSTH-motion correlation more in the synchronized than desynchronized state. In comparison, single unit responses were much more weakly correlated with global movie contrast and luminance (taken as the standard deviation and mean, respectively, of the pixel values of each frame), and did not differ significantly as a function of cortical state (**Fig. 12**). However, both contrast and luminance were again more strongly modulated as a function of stimulus-response delay in the synchronized than desynchronized state (**Fig. 12c,f**).



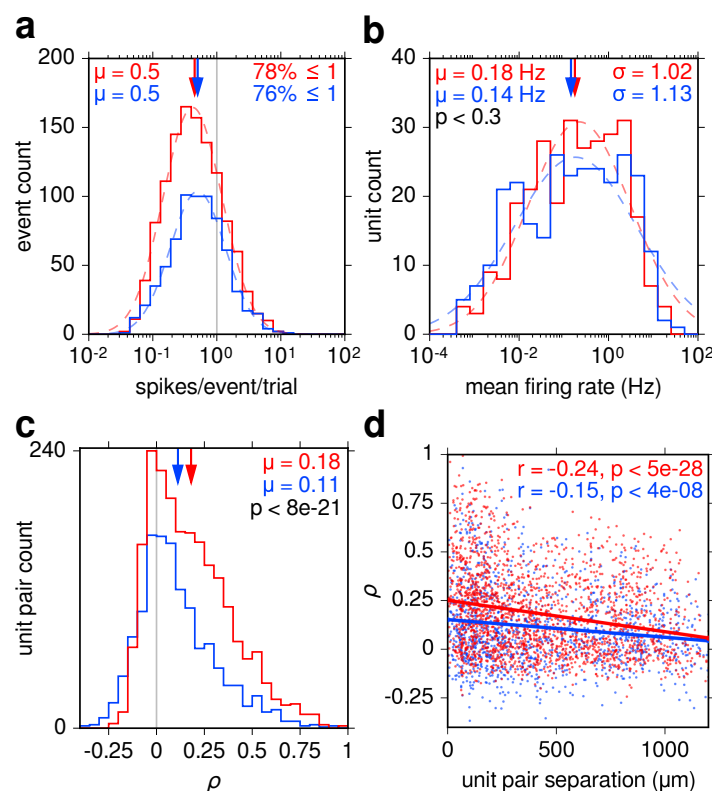

**Figure 8** Response event spike counts, single unit mean firing rates, and response correlations as a function of cortical state. **(a)** Distributions of the number of spikes per response event, per trial, for both cortical states (**red**: synchronized, **blue**: desynchronized). In both states,  $> 75\%$  of response events averaged less than 1 spike per trial (vertical grey line), and were therefore not involved in bursting. Lognormal functions were fit to both distributions (dashed curves, Levenberg-Marquardt algorithm). Arrows denote geometric means ( $\mu$ ). **(b)** Mean firing rate distributions of all isolated single units. Distributions in the synchronized (285 PSTHs) and desynchronized (278 PSTHs) state were not significantly different from each other (Mann-Whitney U test,  $p < 0.3$ ). Arrows denote geometric means. Standard deviations ( $\sigma$ ) are expressed in powers of 10. Lognormal functions were fit to both distributions (dashed curves). **(c)** Distributions of response correlations ( $\rho$ ) for all responsive unit pairs in both states. Arrows indicate means. Correlations were on average weakly positive in both states, but significantly higher in the synchronized state (Mann-Whitney U test,  $p < 8 \times 10^{-21}$ ). **(d)** Response correlations vs. unit pair separation. Response correlations decreased slightly but significantly with increasing unit separation (mostly in depth) in both states. Lines show least squares linear regression (two-sided Student's T-test,  $r$ - and  $p$ -values shown).

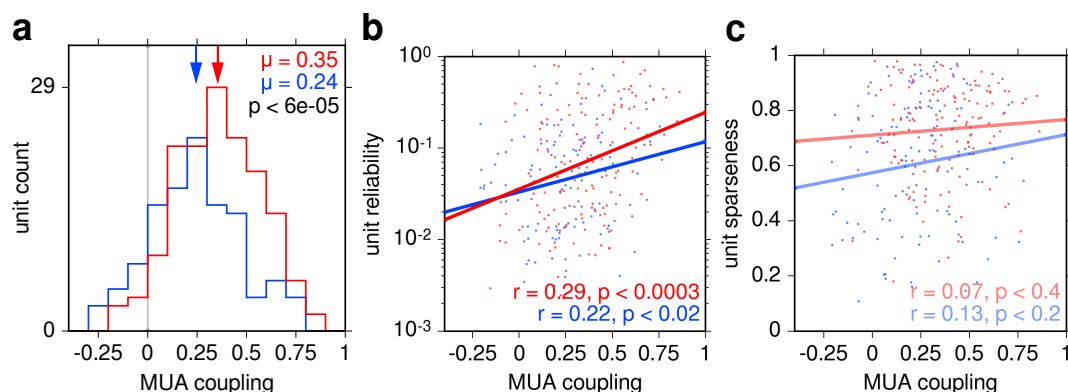

**Figure 9 (Supplementary)** MUA coupling as a function of cortical state. **(a)** MUA coupling (the correlation of each single unit PSTH with the MUA, excluding that unit) distributions for all responsive units in the synchronized (**red**) and desynchronized (**blue**) states. MUA coupling was significantly greater in the synchronized state (Mann-Whitney U test,  $p < 6 \times 10^{-5}$ ). **(b,c)** Single unit response reliability and sparseness vs. MUA coupling for all responsive units. Single unit response reliability was significantly and positively correlated with MUA coupling, in both states, but sparseness was not. Lines show least squares linear regression (two-sided Student's T-test,  $r$ - and  $p$ -values shown in each panel). Desaturated lines and statistics denote insignificant correlations.

## Discussion

Single unit responses to natural scene movie clips consisted of barcode-like response events (**Fig. 3–Fig. 5**), some as little as 10 ms in duration (**Fig. 6a**). Across the population of units, there was great diversity in the patterns of response events, as shown by the low mean pairwise response correlations between units (**Fig. 8c**). There was also a surprisingly wide range of mean firing rates, most below 1 Hz, which approximately followed a lognormal distribution (**Fig. 8b**), in line with an increasing number of reports in various species and cortical areas<sup>24,25</sup>. Interestingly, the distribution of spike counts per response event per trial was also lognormal (**Fig. 8a**), and low enough to preclude bursting as a major component of response events.

There are a handful of existing reports of such temporally precise, reliable and sparse responses to natural scene movies in V1: in awake behaving macaque<sup>26</sup>, and in anesthetized cat, both extracellularly<sup>27,28</sup> and intracellularly<sup>29,30</sup>. Similar precision and reliability have been reported in awake behaving macaque area MT during random dot stimulation with low motion coherence<sup>31</sup>. There have been more reports of even greater temporal precision (events as little as  $\sim 1$  ms wide), reliability and sparseness of responses to high-entropy stimuli in retinal ganglion cells (RGCs) of salamander and rabbit<sup>32</sup>, and in the lateral geniculate nucleus (LGN) of anesthetized cat<sup>33,34</sup>.

As visual information propagates from RGCs to LGN to V1, the temporal precision and reliability of responses generally decrease<sup>35</sup>. It is interesting to consider that this precision is retained at all. LGN inputs constitute only a small fraction of synapses onto (mostly layer 4) cortical cells, yet these inputs are very effective at driving the cortex<sup>36</sup>. In addition to the high effectiveness of LGN-V1 synapses, convergent event-like input from LGN in response to naturalistic stimuli may be another reason for this strong drive<sup>33,37</sup>. Clearly, there must be some evolutionary benefit in maintaining, to some degree, these temporally precise response events in V1. Sparse coding<sup>38</sup> and the energy efficiency<sup>39</sup> that comes with it may be one such reason. Another may relate to delay line

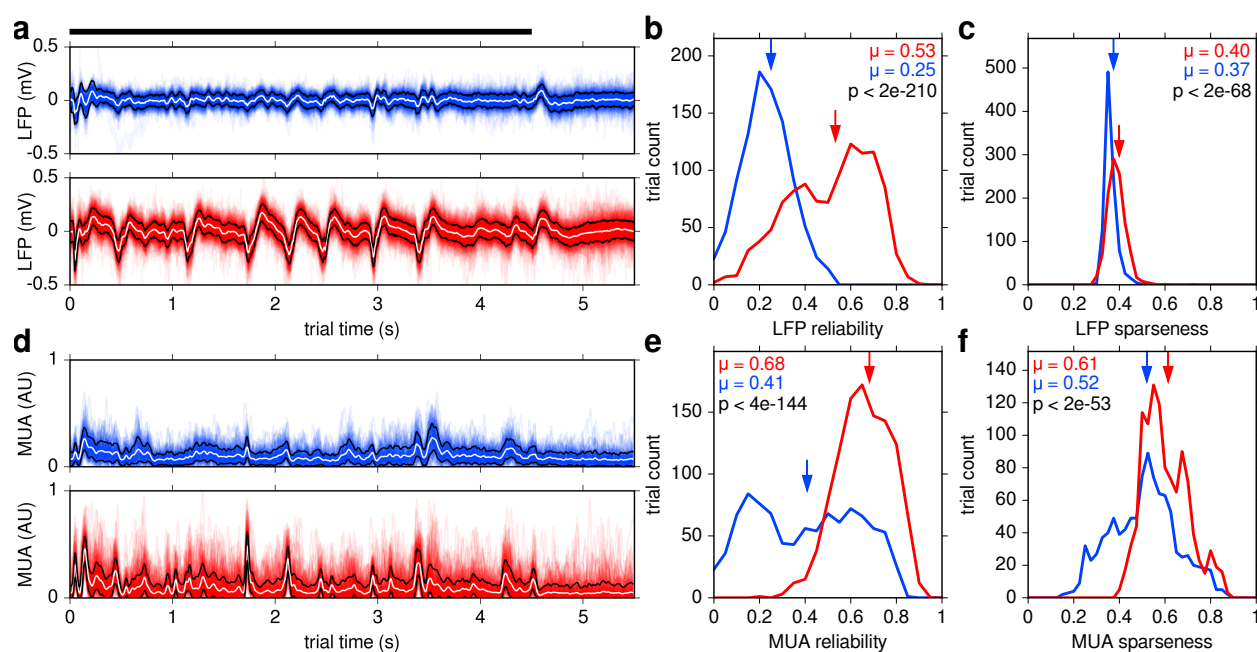

**Figure 10** Trial-aligned LFP and multi-unit activity (MUA) were more reliable and sparse in the synchronized state. (a) Trial-aligned deep-layer LFP traces are shown as semi-transparent lines, in the desynchronized (blue, 127 trials) and synchronized (red, 227 trials) state, for an example recording (same as Fig. 2c). Mean  $\pm 1$  standard deviation are shown as white and black lines, respectively. Black horizontal bar represents movie clip duration. (b) Distributions of LFP trial reliability (Pearson's correlation between the LFP of each trial and the mean of the LFP of all other trials), for both states in all recordings. (c) Distributions of the sparseness of the absolute value of the LFP of each trial, for both states in all recordings. (d-f) Same as (a-c) but for MUA, calculated by combining spike trains from all isolated single units (Methods). All distributions were significantly higher in the synchronized than desynchronized state (Mann-Whitney U test,  $p$  values shown in each panel). Arrows indicate means. Bin widths are 0.05 in (b) & (e) and 0.025 in (c) & (f).

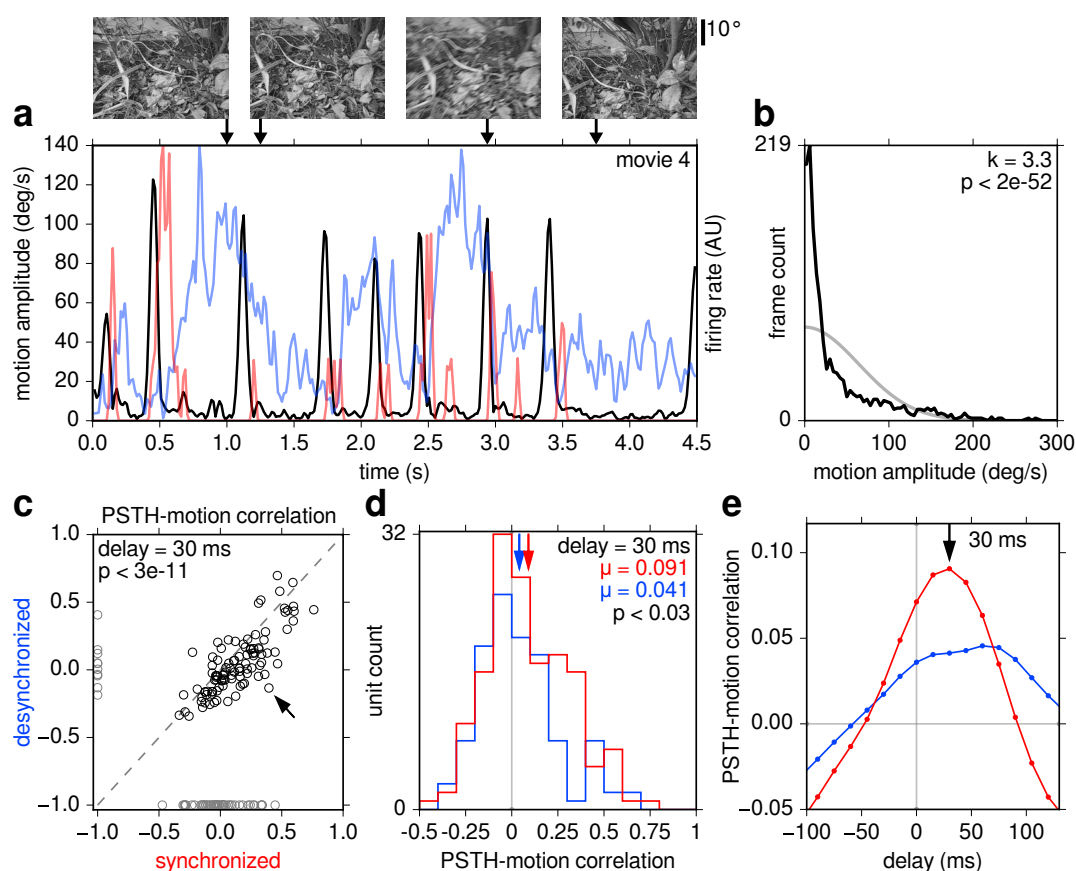

**Figure 11** Global motion within movies and its effect on responses. **(a)** Movie frames (**top**) and global motion amplitude (**bottom, black**) for one example movie. Motion peaks correspond to sudden camera movements, approximating saccades and head movements. The PSTH of one example unit is shown in the synchronized (**red**) and desynchronized (**blue**) state. Allowing for stimulus-response delay, PSTH peaks for this example unit tracked motion amplitude better in the synchronized state. **(b)** Distribution of motion amplitude for all 5 unique movie clips (**black**). Bin widths are 4 deg/s wide. The distribution was highly kurtotic ( $k = 3.3$ ), significantly more so than a normal distribution (Anscombe-Glynn kurtosis test,  $p < 2 \times 10^{-52}$ ). A normal distribution with the same standard deviation and probability mass is shown for comparison (**gray**). **(c)** Scatter plot of correlation between global motion and responsive PSTHs 30 ms later, in the desynchronized vs. synchronized state. For display purposes, units that were nonresponsive in a given state were assigned a value of  $-1$  (**gray**). Excluding these, significantly more units fell below the dashed  $y = x$  line than above it (83%, 86/104,  $p < 3 \times 10^{-11}$ ,  $\chi^2$  test). Arrow denotes the example unit shown in **(a)**. **(d)** Distribution of the points in **(c)** in the synchronized (**red**) and desynchronized (**blue**) state, excluding points assigned a value of  $-1$ . Arrows denote means. PSTH-motion correlations were significantly higher in the synchronized state (Mann-Whitney U test,  $p < 0.03$ ). **(e)** Mean PSTH-motion correlations in both states as a function of delay between stimulus and response. PSTH-motion correlations peaked at 30 ms and were more strongly modulated by delay in the synchronized state.



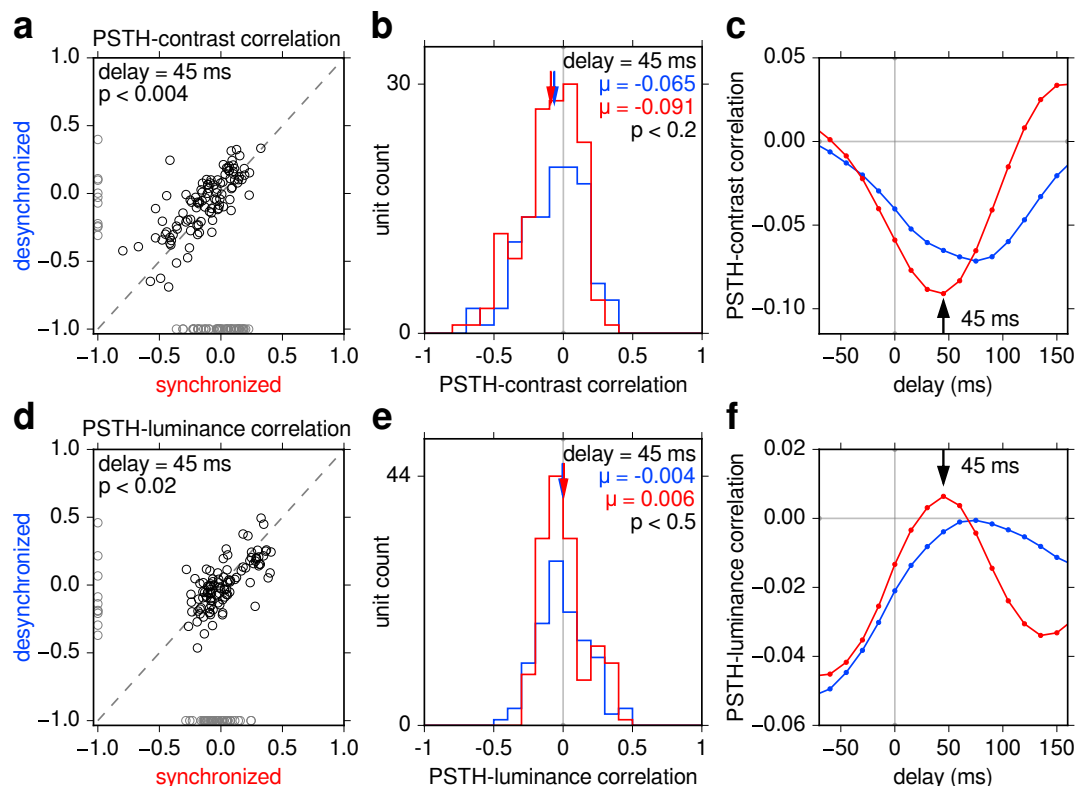

**Figure 12 (Supplementary)** Same as **Fig. 11c–e**, but for movie contrast (**top**) and luminance (**bottom**) instead of motion. Unlike motion, neither showed significantly different correlations with single unit responses as a function of cortical state. (**a,d**) Scatter plots of correlation between responsive PSTHs and global contrast and luminance for desynchronized vs. synchronized states. (**a**) At 45 ms delay, fewer units (**black**) fell below the dashed  $y = x$  line than above it (36%, 37/104,  $p < 0.004$ ,  $\chi^2$  test). (**d**) At 45 ms delay, more units fell below the dashed  $y = x$  line than above it (62%, 64/104,  $p < 0.02$ ,  $\chi^2$  test). For a significance threshold of  $p = 10^{-6}$ , neither  $\chi^2$  test was significant, while that in **Fig. 11c** was. (**b,e**) Distributions corresponding to (**a,d**). In both cases, means were not significantly different between the synchronized (**red**) and desynchronized (**blue**) state (Mann-Whitney U test,  $p$  values shown). (**c,f**) Mean PSTH-contrast and PSTH-luminance correlations in both states as a function of stimulus-response delay, which peaked at 45 ms and 60 ms, respectively. Both were more strongly modulated by delay in the synchronized state, as was the case for PSTH-motion correlations (**Fig. 11e**).

coding<sup>40</sup>, which proposes that precise relatively-timed spikes might allow for simple scale-invariant representations of stimuli. This theory is supported by increasing evidence that cortical cells can respond with high temporal precision and reliability relative to a stimulus, and therefore relative to each other as well.

The spectral content of deep-layer LFP showed that cortical state spontaneously switched between two extremes: the synchronized and desynchronized state (**Fig. 1c**, **Fig. 2a–e**). There are many non-perceptual tasks that even primary sensory cortices might be engaged in during stimulus presentation. Such tasks might include attention<sup>13</sup>, memory formation and recall<sup>41</sup>, reward encoding<sup>42</sup>, locomotion<sup>43</sup>, visualization<sup>44</sup>, synaptic renormalization<sup>45</sup>, and cellular maintenance<sup>46</sup>. Many of these tasks have little to do with encoding the currently presented stimulus. To deal with this multitude of tasks, cortex may need to engage in some kind of task switching, which could be reflected in cortical state changes.

Single unit responses to natural scene movie clips were more precise, reliable and sparse in the synchronized than desynchronized state (**Fig. 6**). The same held for LFP and MUA responses (**Fig. 10**), showing consistency across measures and types of signals. This result is surprising, because it conflicts with recent studies in V1<sup>8</sup>, primary auditory cortex<sup>9,12</sup> (A1) and primary somatosensory cortex (S1)<sup>10,11</sup> of anesthetized rodents. These studies come to the opposite conclusion: responses are more precise and reliable in the *desynchronized* state.

There are many experimental differences that might explain this conflicting result: differences in species (cat vs. rodent<sup>8–12</sup>), anesthetic (isoflurane vs. urethane<sup>8–12</sup>, ketamine/xylazine and fentanyl/medetomidine/midazolam<sup>12</sup>), desynchronization method (spontaneous<sup>12</sup> vs. evoked<sup>8–12</sup>), cortical area (V1<sup>8</sup> vs. A1<sup>9,12</sup> and S1<sup>10,11</sup>), stimulus modality (visual vs. auditory and tactile), stimulus type (naturalistic<sup>8,12</sup> vs. reduced<sup>9–12</sup>), and the use of artificial saccades. Since cortical state is likely multidimensional and SI measures only one such dimension<sup>4</sup>, it is also possible that there were other undetected changes in cortical state in the results presented here but not in those reported in the literature (or vice versa). Such undetected changes might account for some of these opposing results.

The species difference may be the most important. Cats have greater columnar organization of stimulus features in V1 than do rodents: cats have ocular dominance and orientation columns that rodents lack<sup>47</sup>. UP phases in the synchronized state can manifest as waves of spontaneous activity traveling across the cortical surface<sup>3,18–20</sup>, while oriented visual stimuli can evoke standing waves of activity aligned to orientation columns<sup>18</sup>. Presumably, stimulus-evoked standing waves are absent in species that lack orientation columns, including rodents. Perhaps an interaction between these traveling and standing waves of activity in the synchronized state increases the temporal precision and reliability of stimulus-evoked responses in cat but not rodent V1. This hypothesis predicts that responses in the synchronized state of anesthetized ferret and primate V1, which also have orientation columns, should also be more precise and reliable than in the desynchronized state. Conversely, if there is a similar amount of stimulus feature map organization in A1 and S1 of both rodents and higher mammals (i.e., less than in V1 of higher mammals), this hypothesis also predicts that responses of anesthetized cat, ferret and primate A1 and S1 will be more precise and reliable in the desynchronized state, as is the case in rodents<sup>9–12</sup>. This result may also provide an answer to the question of what functional role, if any, cortical columns might play<sup>47</sup>: to increase response precision and reliability. Further experiments that specifically take cortical state into account in sensory areas of anesthetized higher mammals in response to naturalistic stimulation are required to test these predictions.

More broadly, our results also conflict with the general understanding that responses in awake animals are enhanced during attending behavior (when cortex is more desynchronized) compared to quiescent resting behavior (when cortex is more synchronized)<sup>13–17,21,22</sup>. Our results therefore

conflict with the hypothesis that synchronized and desynchronized cortical states in anesthetized animals are respectively analogous to quiescent and attending periods in awake animals<sup>4</sup>. Perhaps the relationship is more complex than previously thought. Indeed, some studies have suggested that the relationship between brain state, behavioral state, and the fidelity of stimulus representation can be surprisingly complex<sup>48–50</sup>.

Although only indirectly shown here using global movie motion (**Fig. 11**), higher precision and reliability of responses during the synchronized state suggest that stimuli are better encoded, and hence more easily decoded, in the synchronized state. Why? With more numerous response events, narrower response events that are less likely to overlap with one another, and greater reliability of response events across trials, spike trains in the synchronized state are more distinctive than in the desynchronized state (**Fig. 3–Fig. 5**), and should therefore be easier to decode. This has been shown more explicitly in other studies<sup>8,12</sup>, but with the opposite conclusion regarding cortical state.

The synchronized and desynchronized cortical states are two ends of a spectrum<sup>4</sup>, and represent perhaps the simplest division of recording periods into different states. The synchronized state is itself composed of rapidly alternating UP and DOWN phases, and the frequency content of the desynchronized state can be highly heterogeneous (**Fig. 1c, Fig. 2a–e**). A more thorough characterization of especially the desynchronized state is needed. Perhaps it may cluster into one of several sub-states. More detailed partitioning of cortical recordings by more detailed characterization of brain state may reveal more surprises among neural responses.

## Methods

### Surgical procedures

Animal experiments followed the guidelines of the Canadian Council for Animal Care and the Animal Care Committee of the University of British Columbia. After initial sedation, animals were intubated and mechanically ventilated (Harvard Apparatus, Holliston, MA) at  $\sim 20$  breaths/min to maintain end-tidal CO<sub>2</sub> of 30–40 mmHg. Anesthesia was maintained by inhalation of 0.5–1.5% isoflurane with 70% N<sub>2</sub>O in O<sub>2</sub>. Blink and pinna (ear) reflexes and toe pinch were used to ensure sufficient anesthetic depth. During surgical procedures and euthanization, up to 3% isoflurane was used. Intramuscular injection of dexamethasone (1 mg/kg) was used to reduce swelling and salivation. The animal was hydrated by intravascular (IV) infusion of a mixture of lactated Ringer’s salt solution (10–20 mL/h), sometimes with added potassium chloride (20 mEq/L) and dextrose (2.5%). Heart rate and blood oxygenation were monitored with a pulse-oximeter (Nonin 8600V), with the sensor placed on the tongue or a shaved portion of tail. Mean arterial blood pressure was monitored with a doppler blood pressure monitor (Parks Medical 811-B) on a shaved section of hind leg. Body temperature was maintained at 37°C via closed-loop control with a homeothermic blanket (Harvard Apparatus). All vital signs were logged during the course of each experiment. Experiments lasted up to 3 days each.

Animals were placed in a stereotaxic frame on an air table, with ear bars coated in topical anesthetic (5% lidocaine). Local anesthetic (bupivacaine) was injected subcutaneously around the top of the skull and into the ear muscles before cutting the skin to expose the skull. A roughly 4 × 6 mm craniotomy (1–5 mm lateral and 3–9 mm posterior relative to the centerline and earbar zero, respectively) was drilled with a dental drill (Midwest Stylus, DENTSPLY Professional, Des Plaines, IL) over Brodmann’s area 17 and 18. A stereo surgical microscope was used during drilling, removal of meninges, and polytrode insertion. Artificial cerebrospinal fluid (ACSF) was used to flush away blood and other detritus from the meninges, and to keep them moist. Ophthalmic

surgical sponges (Ultracell Eye Spears, Aspen Surgical, Caledonia, MI) were used to wick blood and excess fluid away. Care was taken to not apply pressure to the brain. A small area of dura was dissected away one layer at a time with an ophthalmic slit knife (Beaver Optimum 15°, BD Medical, Le Pont-de-Claix, France; or ClearCut 3.2 mm, Alcon, Mississauga, ON). A small nick in the pia was then made with the ophthalmic slit knife to allow for polytrode insertion. Prior to insertion, CSF was wicked away from the point of insertion using an ophthalmic surgical sponge to improve unit isolation. Immediately before or after insertion, high purity low temperature agarose (Type III-A, Sigma-Aldrich, St. Louis, MO) dissolved in ACSF at a concentration of 2.5–4% was applied in liquid form at 38–40°C to the craniotomy. This quickly set and eliminated brain movement due to heart beat and respiration. The polytrode was advanced through the tissue using a manual micromanipulator (Model 1460 Electrode Manipulator, David Kopf Instruments, Tujunga, CA) under visual control until the topmost electrode sites disappeared below the surface of the cortex. Any further advancement through the tissue was made with a hydraulic micromanipulator (Narishige MHW-4, East Meadow, NY), typically 150–300  $\mu\text{m}$  at a time.

Nictitating membranes were retracted with phenylephrine (10%, 1–2 drops/eye), and pupils were dilated with tropicamide (0.5%, 1–2 drops/eye). Custom-made rigid gas permeable contact lenses (14 mm diameter, 7.8–8.7 mm base curvature, +2.00 to +4.00 diopter, Harbour City Contact Lens Service, Nanaimo, BC) protected the eyes and refracted the cat's vision to the distance of the stimulus display monitor. To improve focus, 3 mm diameter artificial pupils were placed directly in front of the lenses. To prevent eye drift, one animal (ptc22, **Fig. 1** & **Fig. 2d,e**) was given an initial IV bolus of the systemic paralytic pancuronium bromide (1 mg/kg), and paralysis was maintained by constant rate infusion (0.2 mg/kg/h). For the other two animals (ptc17 & ptc18, **Fig. 2a–c**)  $\alpha$ -bungarotoxin was instead injected retrobulbarly (125  $\mu\text{M}$ , 0.5 mL per eye) as a local paralytic. Eye position was closely monitored by reverse ophthalmoscopy to ensure stability, using fine blood vessels as landmarks. Receptive fields (mapped with a manually controlled light or dark bar) fell within a few degrees of the area centralis.

## Recordings

Extracellular recordings were made from cortical area 17 of 3 anesthetized adult cats (2 male, 1 female), using 54-site single shank (15  $\mu\text{m}$  thick, 207  $\mu\text{m}$  wide, 1138 or 1325  $\mu\text{m}$  long) silicon polytrodes<sup>51,52</sup> (NeuroNexus, Ann Arbor, MI), with electrode sites arranged in 2 or 3 columns in a hexagonal layout (50 or 65  $\mu\text{m}$  spacing). Four recordings were in the left hemisphere and two in the right. In total, four unique hemispheres were recorded from in 3 cats. Polytrodes were inserted perpendicular to the pial surface until the topmost electrode site disappeared below the surface. For 3 of the 6 recordings (not those shown in **Fig. 3–Fig. 5**), the polytrode was advanced a further 150–600  $\mu\text{m}$  to increase the number of isolatable units. Histological track reconstruction was not successful.

Extracellular voltage waveforms from all 54 electrode sites were unity-gain buffered by a pair of 27-channel headstages (HS-27, Neuralynx, Tucson, AZ), and amplified by a 64-channel 5000 $\times$  amplifier with fixed analog filters (FA-I-64, Multichannel Systems, Reutlingen, Germany). The first 54 channels of the amplifier were high-pass analog filtered (0.5–6 kHz) for use as spike channels. Data from a subset of 10 of the 54 electrode sites, evenly distributed along the length of the polytrode, were also separately low-pass analog filtered (0.1–150 Hz) for use as LFP channels. All 64 channels were then digitally sampled (25 kHz for the high-pass channels, 1 kHz for the low-pass channels) by a pair of 12-bit 32-channel acquisition boards with an internal gain of 1–8 $\times$  (DT3010, Data Translations, Marlboro, MA), controlled by custom software written in Delphi<sup>52</sup>.

Spike sorting was done using custom open source software written in Python (<http://spyke>).



github.io). A “divide-and-conquer” spike sorting method<sup>53</sup> translated correlated multisite voltages into action potentials of spatially localized, isolated neurons. This method tracked neurons over periods of many hours despite drift, and distinguished neurons with mean firing rates < 0.05 Hz. The steps in this method were: 1) Nyquist interpolation<sup>54</sup> to 50 kHz; 2) sample-and-hold delay correction; 3) spike detection; 4) initial clustering based on the channel of maximum amplitude; 5) spike alignment within each initial cluster; 6) channel and time range selection around the spikes in each initial cluster; 7) dimension reduction (multichannel PCA, ICA, and/or spike time) into a 3D cluster space; 8) clustering in 3D using a gradient-ascent based clustering algorithm (GAC)<sup>53</sup>; 9) exhaustive pairwise comparisons of each cluster to every other physically near cluster. Each spike was localized in 2D physical space along the polytrode by fitting a 2D spatial Gaussian to the signal amplitudes using the Levenberg-Marquardt algorithm. Free parameters were x and y coordinates, and spatial standard deviation.

## Visual stimulation

Visual stimuli were presented with millisecond precision using custom open source software written in Python (<http://dimstim.github.io>) based on the VisionEgg<sup>55</sup> library (<http://visionegg.org>). Stimuli were displayed on a flat 19” (36 × 27 cm) CRT monitor (Iiyama HM903DTB) at 800×600 resolution and 200 Hz refresh rate. A high refresh rate was used to prevent artifactual phase locking of neurons in V1 to the screen raster<sup>56</sup>. One of the 6 recordings (ptc17.tr2b.r58, **Fig. 2a**) intentionally used a low 66 Hz refresh rate in an attempt to induce phase-locking, but this did not affect the results presented here. The monitor was placed 57 cm in front of the cat’s eyes. At this distance, 1 cm on the screen subtended 1° of visual angle, and the monitor subtended horizontal and vertical angles of ~ 36° and 27° respectively. The monitor had a maximum luminance of 116 cd/m<sup>2</sup>. Display monitors are typically gamma corrected to linearize output light levels when presenting computer-generated stimuli such as bars and gratings. However, gamma correction was not applied here during natural scene movie presentation because gamma correction already occurs in cameras during the video capture process<sup>57</sup>.

Movies were acquired using a hand-held consumer-grade digital camera (Canon PowerShot SD200) at a resolution of 320×240 pixels and 60 frames/s. Movies were filmed close to the ground, in a variety of wooded or grassy locations in Vancouver, BC. Footage consisted mostly of dense grass and foliage with a wide variety of oriented edges. Focus was kept within 2 m and exposure settings were set to automatic. The horizontal angle subtended by the camera lens (51.6°) was measured for proper scaling to match the visual angle subtended by the movie on the stimulus monitor. In addition to the **Supplemental Movie**, another example movie (corresponding to **Fig. 1** and the upper panels of **Fig. 3** & **Fig. 4**) is available at <http://dimstim.github.io>. Others are available upon request. Movies contained simulated saccades (peaks in **Fig. 11a**) of up to 275°/s, generated by manual camera movements in order to mimic gaze shifts (eye and head movements), which can exceed 300°/s in cat<sup>58</sup>. The movies contained little or no forward/backward optic flow. Movies were converted from color to grayscale, and were presented at 66 Hz. Depending on the refresh rate (see above), each frame corresponded to either 1 or 3 screen refreshes. Global motion was calculated for every neighboring pair of movie frames<sup>59</sup> using the OpenCV library (<http://opencv.org>). Global contrast and luminance were calculated for each frame by taking the standard deviation and mean, respectively, of all the pixel values in each frame.

## Cortical state characterization

When constructing spectrograms, 60 Hz mains interference was digitally filtered out with a 0.5 Hz wide elliptic notch filter (negative peak in **Fig. 2f**). The SI ( $L/(L+H)$  ratio<sup>60</sup>) was calculated from the deep-layer LFP spectrogram using 30 s wide overlapping time bins at 5 s resolution. SI thresholds for the synchronized and desynchronized state were  $> 0.85$  and  $< 0.8$ , respectively. However, visual inspection of the spectrogram was used in tandem with the SI, so the above thresholds were not hard limits. Choosing a lower SI threshold to limit analysis to desynchronized periods with a more consistent LFP spectrum did not substantially change results (not shown).

## Response characterization

Spike and LFP analyses were performed using custom open source software<sup>61</sup> written in Python (<http://neurophy.github.io>). PSTHs were calculated by convolving a Gaussian of width  $2\sigma = 20$  ms with the spike train collapsed across all trials that fell within the recording period of interest. Detecting response events in a trial raster plot is a clustering problem: how do spike times cluster together into response events, with temporal density significantly greater than background firing levels? As for spike sorting (see above), spike time clustering was performed using the GAC algorithm, with a characteristic neighborhood size<sup>53</sup> of 20 ms. Spike time clusters containing less than 5 spikes were discarded. The center of each detected cluster of spike times was matched to the nearest peak in the PSTH. A threshold of  $\theta = b + 3$  Hz was applied to the matching PSTH peak, where  $b = 2 \text{median}(x)$  is the baseline of each PSTH  $x$ . Peaks in the PSTH that fell below  $\theta$  were discarded, and all others were treated as valid response events. The equation for  $\theta$  was derived by trial and error, and visual inspection of all 1870 detected peaks in all 563 PSTHs confirmed that there were no obvious false positive or negative detections. This threshold for detecting peaks in the PSTHs did not cause a sudden cutoff at the low end in the number of spikes per detected response event per trial (**Fig. 8a**). Response event widths were measured as the temporal separation of the middle 68% (16th to 84th percentile) of spike times within each cluster.

The mean firing rate of each unit in a given cortical state (**Fig. 8b**) was calculated by its spike count in that state, divided by the state's duration. Mean firing rates therefore included the 1 s period of blank gray screen between movie clip presentations. Units were not required to surpass a mean firing rate threshold for inclusion for analysis. For most analyses, the only requirement was that they were responsive, i.e., that they had at least one detected response event in their PSTH.

The sparseness<sup>26</sup>  $S$  of a signal (whether PSTH, absolute value of LFP, or MUA) was calculated by

$$S = \left( 1 - \frac{\left( \sum_{i=1}^n r_i/n \right)^2}{\sum_{i=1}^n r_i^2/n} \right) \left( \frac{1}{1 - 1/n} \right) \quad (1)$$

where  $r_i \geq 0$  is the signal value in the  $i^{\text{th}}$  time bin, and  $n$  is the number of time bins. Sparseness ranges from 0 to 1, with 0 corresponding to a uniform signal, and 1 corresponding to a signal with all of its energy in a single time bin.

Although the 1 s period of blank screen separating each trial is shown at the end of each recording trace in **Fig. 3–Fig. 5** & **Fig. 10a,d**, precision, reliability and sparseness measures in **Fig. 6** & **Fig. 10** excluded this inter-trial period of blank screen.

Multiunit activity (MUA) (**Fig. 10d–f**) was calculated by combining the spike trains of all isolated single units, binning them at 20 ms resolution, and then convolving the resulting multi-

nit spike count signal with a Gaussian of width  $2\sigma = 20$  ms. MUA coupling was calculated by correlating each unit's PSTH with the trial averaged MUA excluding that unit. MUA coupling was calculated somewhat differently from the original<sup>23</sup> method by taking Pearson's correlation between each PSTH and the MUA.

## Acknowledgements

We thank Curtis L. Baker for detailed comments on the manuscript. This work was supported by grants from the Canadian Institutes of Health Research and the Natural Sciences and Engineering Research Council of Canada.

## References

1. Berger, H. Über das elektrenkephalogramm des Menschen. *Arch Psychiatr Nervenkr* **87**, 527–570 (1929).
2. Arieli, A., Sterkin, A., Grinvald, A. & Aertsen, A. Dynamics of ongoing activity: explanation of the large variability in evoked cortical responses. *Science* **273**, 1868–1871 (1996).
3. Petersen, C.C.H., Hahn, T.T.G., Mehta, M., Grinvald, A. & Sakmann, B. Interaction of sensory responses with spontaneous depolarization in layer 2/3 barrel cortex. *PNAS* **100**, 13638–13643 (2003).
4. Harris, K.D. & Thiele, A. Cortical state and attention. *Nat Rev Neurosci* **12**, 509–523 (2011).
5. Destexhe, A., Contreras, D. & Steriade, M. Spatiotemporal analysis of local field potentials and unit discharges in cat cerebral cortex during natural wake and sleep states. *J Neurosci* **19**, 4595–4608 (1999).
6. Olshausen, B.A. & Field, D.J. How close are we to understanding V1? *Neural Comput* **17**, 1665–1699 (2005).
7. Carandini, M. *et al.* Do we know what the early visual system does? *J Neurosci* **25**, 10577–10597 (2005).
8. Goard, M. & Dan, Y. Basal forebrain activation enhances cortical coding of natural scenes. *Nat Neurosci* **12**, 1444–1449 (2009).
9. Marguet, S.L. & Harris, K.D. State-dependent representation of amplitude-modulated noise stimuli in rat auditory cortex. *J Neurosci* **31**, 6414–6420 (2011).
10. Hirata, A. & Castro-Alamancos, M.A. Effects of cortical activation on sensory responses in barrel cortex. *J Neurophysiol* **105**, 1495–1505 (2011).
11. Zagha, E., Casale, A.E., Sachdev, R.N.S., McGinley, M.J. & McCormick, D.A. Motor cortex feedback influences sensory processing by modulating network state. *Neuron* **79**, 567–578 (2013).
12. Pachitariu, M., Lyamzin, D.R., Sahani, M. & Lesica, N.A. State-dependent population coding in primary auditory cortex. *J Neurosci* **35**, 2058–2073 (2015).

- 482 13. Roelfsema, P.R., Lamme, V.A.F. & Spekreijse, H. Object-based attention in the primary visual  
483 cortex of the macaque monkey. *Nature* **395**, 376–381 (1998).
- 484 14. Fries, P., Reynolds, J.H., Rorie, A.E. & Desimone, R. Modulation of oscillatory neuronal  
485 synchronization by selective visual attention. *Science* **291**, 1560–1563 (2001).
- 486 15. Cohen, M.R. & Maunsell, J.H.R. Attention improves performance primarily by reducing in-  
487 terneuronal correlations. *Nat Neurosci* **12**, 1594–1600 (2009).
- 488 16. Mitchell, J.F., Sundberg, K.A. & Reynolds, J.H. Spatial attention decorrelates intrinsic activity  
489 fluctuations in macaque area V4. *Neuron* **63**, 879–888 (2009).
- 490 17. Chalk, M. *et al.* Attention reduces stimulus-driven gamma frequency oscillations and spike field  
491 coherence in V1. *Neuron* **66**, 114–125 (2010).
- 492 18. Benucci, A., Frazor, R.A. & Carandini, M. Standing waves and traveling waves distinguish two  
493 circuits in visual cortex. *Neuron* **55**, 103–117 (2007).
- 494 19. Xu, W., Huang, X. and Takagaki, K. & Wu, J. Compression and reflection of visually evoked  
495 cortical waves. *Neuron* **55**, 119–129 (2007).
- 496 20. Sato, T.K., Nauhaus, I. & Carandini, M. Traveling waves in visual cortex. *Neuron* **75**, 218–229  
497 (2012).
- 498 21. Pinto, L. *et al.* Fast modulation of visual perception by basal forebrain cholinergic neurons.  
499 *Nat Neurosci* **16**, 1857–1863 (2013).
- 500 22. Reimer, J. *et al.* Pupil fluctuations track fast switching of cortical states during quiet wakeful-  
501 ness. *Neuron* **84**, 355–362 (2014).
- 502 23. Okun, M. *et al.* Diverse coupling of neurons to populations in sensory cortex. *Nature* **521**,  
503 511–5 (2015).
- 504 24. Wohrer, A., Humphries, M.D. & Machens, C.K. Population-wide distributions of neural activity  
505 during perceptual decision-making. *Prog Neurobiol* **103**, 156–193 (2013).
- 506 25. Buzsáki, G. & Mizuseki, K. The log-dynamic brain: how skewed distributions affect network  
507 operations. *Nat Rev Neurosci* **15**, 264–278 (2014).
- 508 26. Vinje, W.E. & Gallant, J.L. Sparse coding and decorrelation in primary visual cortex during  
509 natural vision. *Science* **287**, 1273–1276 (2000).
- 510 27. Yen, S.C., Baker, J. & Gray, C.M. Heterogeneity in the responses of adjacent neurons to natural  
511 stimuli in cat striate cortex. *J Neurophysiol* **97**, 1326–1341 (2007).
- 512 28. Herikstad, R., Baker, J., Lachaux, J.P., Gray, C.M. & Yen, S.C. Natural movies evoke spike  
513 trains with low spike time variability in cat primary visual cortex. *J Neurosci* **31**, 15844–15860  
514 (2011).
- 515 29. Haider, B. *et al.* Synaptic and network mechanisms of sparse and reliable visual cortical activity  
516 during nonclassical receptive field stimulation. *Neuron* **65**, 107–121 (2010).
- 517 30. Baudot, P. *et al.* Animation of natural scene by virtual eye-movements evokes high precision  
518 and low noise in V1 neurons. *Front Neural Circuits* **7** (2013).



- 519 31. Bair, W. & Koch, C. Temporal precision of spike trains in extrastriate cortex of the behaving  
520 macaque monkey. *Neural Comput* **8**, 1185–1202 (1996).
- 521 32. Berry, M.J., Warland, D.K. & Meister, M. The structure and precision of retinal spike trains.  
522 *PNAS* **94**, 5411–5416 (1997).
- 523 33. Alonso, J.M., Usrey, W.M. & Reid, R.C. Precisely correlated firing in cells of the lateral  
524 geniculate nucleus. *Nature* **383**, 815–819 (1996).
- 525 34. Reinagel, P. & Reid, R.C. Temporal coding of visual information in the thalamus. *J Neurosci*  
526 **20**, 5392–400 (2000).
- 527 35. Kara, P., Reinagel, P. & Reid, R.C. Low response variability in simultaneously recorded retinal,  
528 thalamic, and cortical neurons. *Neuron* **27**, 635–646 (2000).
- 529 36. Ahmed, B., Anderson, J.C., Douglas, R.J., Martin, K.A.C. & Nelson, J.C. Polynuclear  
530 innervation of spiny stellate neurons in cat visual cortex. *J Comp Neurol* **341**, 39–49 (1994).
- 531 37. Wang, H.P., Spencer, D., Fellous, J.M. & Sejnowski, T.J. Synchrony of thalamocortical inputs  
532 maximizes cortical reliability. *Science* **328**, 106–109 (2010).
- 533 38. Olshausen, B.A. & Field, D.J. Emergence of simple-cell receptive field properties by learning  
534 a sparse code for natural images. *Nature* **381**, 607–609 (1996).
- 535 39. Attwell, D. & Laughlin, S.B. An energy budget for signaling in the grey matter of the brain.  
536 *J Cereb Blood Flow Metab* **21**, 1133–1145 (2001).
- 537 40. Hopfield, J.J. Pattern recognition computation using action potential timing for stimulus  
538 representation. *Nature* **376**, 33–36 (1995).
- 539 41. Ji, D. & Wilson, M.A. Coordinated memory replay in the visual cortex and hippocampus  
540 during sleep. *Nat Neurosci* **10**, 100–107 (2007).
- 541 42. Shuler, M.G. & Bear, M.F. Reward timing in the primary visual cortex. *Science* **311**, 1606–1609  
542 (2006).
- 543 43. Saleem, A.B., Ayaz, A., Jeffery, K.J., Harris, K.D. & Carandini, M. Integration of visual  
544 motion and locomotion in mouse visual cortex. *Nat Neurosci* **16**, 1864–1869 (2013).
- 545 44. Kosslyn, S.M. *et al.* The role of area 17 in visual imagery: convergent evidence from PET and  
546 rTMS. *Science* **284**, 167–170 (1999).
- 547 45. Turrigiano, G.G., Leslie, K.R., Desai, N.S., Rutherford, L.C. & Nelson, S.B. Activity-dependent  
548 scaling of quantal amplitude in neocortical neurons. *Nature* **391**, 892–896 (1998).
- 549 46. Vyazovskiy, V.V. & Harris, K.D. Sleep and the single neuron: the role of global slow oscillations  
550 in individual cell rest. *Nat Rev Neurosci* **14**, 443–451 (2013).
- 551 47. Horton, J.C. & Adams, D.L. The cortical column: a structure without a function. *Phil Trans*  
552 *R Soc B* **360**, 837–862 (2005).
- 553 48. Wikler, A. Pharmacologic dissociation of behavior and EEG “sleep patterns” in dogs; morphine,  
554 N-allylnormorphine, and atropine. *Exp Biol Med* **79**, 261–265 (1952).

- 555 49. Sachidhanandam, S., Sreenivasan, V., Kyriakatos, A., Kremer, Y. & Petersen, C.C.H. Mem-  
556 brane potential correlates of sensory perception in mouse barrel cortex. *Nat Neurosci* **16**,  
557 1671–1677 (2013).
- 558 50. Tan, A.Y.Y., Chen, Y., Scholl, B., Seidemann, E. & Priebe, N.J. Sensory stimulation shifts  
559 visual cortex from synchronous to asynchronous states. *Nature* **509**, 226–229 (2014).
- 560 51. Drake, K.L., Wise, K.D., Farraye, J., Anderson, D.J. & BeMent, S.L. Performance of planar  
561 multisite microprobes in recording extracellular single-unit intracortical activity. *IEEE Trans*  
562 *Biomed Eng* **35**, 719–732 (1988).
- 563 52. Blanche, T.J., Spacek, M.A., Hetke, J.F. & Swindale, N.V. Polytrodes: high-density silicon  
564 electrode arrays for large-scale multiunit recording. *J Neurophysiol* **93**, 2987–3000 (2005).
- 565 53. Swindale, N.V. & Spacek, M.A. Spike sorting for polytrodes: a divide and conquer approach.  
566 *Front Syst Neurosci* **8**, 6 (2014).
- 567 54. Blanche, T.J. & Swindale, N.V. Nyquist interpolation improves neuron yield in multiunit  
568 recordings. *J Neurosci Meth* **155**, 81–91 (2006).
- 569 55. Straw, A.D. Vision Egg: an open-source library for realtime visual stimulus generation. *Front*  
570 *Neuroinform* **2**, 4 (2008).
- 571 56. Williams, P.E., Mechler, F., Gordon, J., Shapley, R. & Hawken, M.J. Entrainment to video  
572 displays in primary visual cortex of macaque and humans. *J Neurosci* **24**, 8278–8288 (2004).
- 573 57. Poynton, C.A. Rehabilitation of gamma. In B.E. Rogowitz & T.N. Pappas, editors, *Human*  
574 *Vision and Electronic Imaging III*, volume 3299, 232–249. International Society for Optical  
575 Engineering, San Jose, CA (1998).
- 576 58. Munoz, D.P., Guitton, D. & Pelisson, D. Control of orienting gaze shifts by the tectoreticu-  
577 lospinal system in the head-free cat. III. Spatiotemporal characteristics of phasic motor dis-  
578 charges. *J Neurophysiol* **66**, 1642–1666 (1991).
- 579 59. Farnebäck, G. Two-frame motion estimation based on polynomial expansion. In *Image Anal-*  
580 *ysis*, 363–370. Springer (2003).
- 581 60. Saleem, A.B., Chadderton, P., Apergis-Schoute, J., Harris, K.D. & Schultz, S.R. Methods for  
582 predicting cortical UP and DOWN states from the phase of deep layer local field potentials. *J*  
583 *Comput Neurosci* **29**, 49–62 (2010).
- 584 61. Spacek, M.A., Blanche, T.J. & Swindale, N.V. Python for large-scale electrophysiology. *Front*  
585 *Neuroinform* **2**, 9 (2009).
